# Supplementary material for: A phase 1b study evaluating the safety and pharmacokinetics of regorafenib in combination with cetuximab in patients with advanced solid tumors
Source: PubMed Central journal article supplement — Int J Cancer. 2019 Jun 14;145(9):2450–8. doi: 10.1002/ijc.32317 (PMC6771657; doi:10.1002/ijc.32317), 2019-06-14
Supplement: IJC-145-2450-s001.pdf [file IJC-145-2450-s001.pdf]

## **Supplementary Information**

### **A phase 1b study evaluating the safety and pharmacokinetics of regorafenib in combination with cetuximab in patients with advanced solid tumors**

Colin Weekes<sup>1</sup>, A. Craig Lockhart<sup>2</sup>, James J. Lee<sup>3</sup>, Isrid Sturm<sup>4</sup>, Adriaan Cleton<sup>4</sup>, Funan Huang<sup>5</sup>, Heinz-Josef Lenz<sup>6</sup>

<sup>1</sup>Massachusetts General Hospital, Boston, MA; <sup>2</sup>University of Miami/Sylvester Comprehensive Cancer Center, Miami, FL; <sup>3</sup>University of Pittsburgh School of Medicine, Pittsburgh, PA; <sup>4</sup>Bayer AG, Berlin, Germany; <sup>5</sup>Bayer HealthCare Pharmaceuticals, Whippany, NJ; <sup>6</sup>University of Southern California/Norris Comprehensive Center, Los Angeles, CA.

## Supporting Information

**Table S1. Most frequent TEAEs irrespective of causality during the combination treatment phase ( $\geq 9$  patients; safety analysis set,  $N = 42$ )**

| MedDRA preferred term,<br>n (%) | Continuous regorafenib<br>60 mg plus cetuximab<br><i>n</i> = 5 |                | Continuous regorafenib<br>100 mg plus cetuximab<br><i>n</i> = 6 |                | Intermittent regorafenib<br>120 mg plus cetuximab<br><i>n</i> = 8 |                | Intermittent regorafenib<br>160 mg plus cetuximab<br><i>n</i> = 23 |                | Total<br><i>N</i> = 42 |                |
|---------------------------------|----------------------------------------------------------------|----------------|-----------------------------------------------------------------|----------------|-------------------------------------------------------------------|----------------|--------------------------------------------------------------------|----------------|------------------------|----------------|
|                                 | All grade                                                      | Grade $\geq 3$ | All grade                                                       | Grade $\geq 3$ | All grade                                                         | Grade $\geq 3$ | All grade                                                          | Grade $\geq 3$ | All grade              | Grade $\geq 3$ |
| Fatigue                         | 4 (80)                                                         | 0              | 5 (83)                                                          | 3 (50)         | 4 (50)                                                            | 1 (13)         | 9 (39)                                                             | 3 (13)         | 22 (52)                | 7 (17)         |
| Hypophosphatemia                | 3 (60)                                                         | 3 (60)         | 3 (50)                                                          | 0              | 6 (75)                                                            | 6 (75)         | 8 (35)                                                             | 4 (17)         | 20 (48)                | 13 (31)        |
| Diarrhea                        | 4 (80)                                                         | 2 (40)         | 3 (50)                                                          | 0              | 3 (38)                                                            | 0              | 7 (30)                                                             | 1 (4)          | 17 (40)                | 3 (7)          |
| Hypertension                    | 4 (80)                                                         | 1 (20)         | 2 (33)                                                          | 0              | 0                                                                 | 0              | 8 (35)                                                             | 2 (9)          | 15 (36)                | 3 (7)          |
| Decreased appetite              | 2 (40)                                                         | 0              | 3 (50)                                                          | 0              | 2 (25)                                                            | 1 (13)         | 8 (35)                                                             | 1 (4)          | 15 (36)                | 2 (5)          |
| Nausea                          | 2 (40)                                                         | 1 (20)         | 0                                                               | 0              | 3 (38)                                                            | 0              | 9 (39)                                                             | 2 (9)          | 14 (33)                | 3 (7)          |
| AST increased                   | 2 (40)                                                         | 0              | 3 (50)                                                          | 0              | 1 (13)                                                            | 0              | 7 (30)                                                             | 2 (9)          | 13 (31)                | 2 (5)          |
| Dermatitis acneiform            | 3 (60)                                                         | 1 (20)         | 3 (50)                                                          | 0              | 1 (13)                                                            | 0              | 6 (26)                                                             | 0              | 13 (31)                | 1 (2)          |
| Constipation                    | 2 (40)                                                         | 0              | 1 (17)                                                          | 0              | 1 (13)                                                            | 0              | 8 (35)                                                             | 0              | 12 (29)                | 0              |
| Hyponatremia                    | 3 (60)                                                         | 1 (20)         | 4 (67)                                                          | 0              | 0                                                                 | 0              | 5 (22)                                                             | 1 (4)          | 12 (29)                | 2 (5)          |
| ALT increased                   | 1 (20)                                                         | 0              | 3 (50)                                                          | 0              | 0                                                                 | 0              | 7 (30)                                                             | 2 (9)          | 11 (26)                | 2 (5)          |
| Hypoalbuminemia                 | 2 (40)                                                         | 1 (20)         | 3 (50)                                                          | 0              | 0                                                                 | 0              | 6 (26)                                                             | 1 (4)          | 11 (26)                | 2 (5)          |
| Vomiting                        | 1 (20)                                                         | 0              | 0                                                               | 0              | 3 (38)                                                            | 0              | 6 (26)                                                             | 2 (9)          | 10 (24)                | 2 (5)          |
| Hypokalemia                     | 3 (60)                                                         | 0              | 1 (17)                                                          | 0              | 1 (13)                                                            | 0              | 6 (26)                                                             | 1 (4)          | 11 (26)                | 1 (2)          |
| Hypomagnesemia                  | 1 (20)                                                         | 0              | 2 (33)                                                          | 0              | 1 (13)                                                            | 0              | 7 (30)                                                             | 1 (4)          | 11 (26)                | 1 (2)          |

|                                     |        |        |        |        |        |        |        |   |         |        |
|-------------------------------------|--------|--------|--------|--------|--------|--------|--------|---|---------|--------|
| Dysphonia                           | 1 (20) | 0      | 2 (33) | 1 (17) | 2 (25) | 0      | 6 (26) | 0 | 11 (26) | 1 (2)  |
| Hypocalcemia                        | 4 (80) | 0      | 3 (50) | 0      | 1 (13) | 0      | 3 (13) | 0 | 11 (26) | 0      |
| Chills                              | 0      | 0      | 0      | 0      | 2 (25) | 0      | 7 (30) | 0 | 9 (21)  | 0      |
| Weight decreased                    | 1 (20) | 0      | 1 (17) | 0      | 1 (13) | 0      | 7 (30) | 0 | 10 (24) | 0      |
| Dyspnea                             | 2 (40) | 0      | 2 (33) | 0      | 1 (13) | 0      | 5 (22) | 0 | 10 (24) | 0      |
| Gamma-glutamyltransferase increased | 1 (20) | 1 (20) | 3 (50) | 2 (33) | 1 (13) | 1 (13) | 3 (13) | 0 | 8 (19)  | 4 (10) |
| Dehydration                         | 2 (40) | 1 (20) | 3 (50) | 0      | 0      | 0      | 3 (13) | 0 | 8 (19)  | 1 (2)  |
| Rash                                | 0      | 0      | 0      | 0      | 6 (75) | 0      | 3 (13) | 0 | 9 (21)  | 0      |

Abbreviations: ALT, alanine aminotransferase; AST, aspartate aminotransferase; MedDRA, Medical Dictionary for Regulatory Activities; TEAE, treatment-emergent adverse event.

**Table S2. Hematologic and biochemical toxicities of worst CTCAE grades 3 or 4 (safety analysis set)**

| NCI-CTCAE categories and terms                       | Worst CTCAE grade | Continuous regorafenib 60 mg plus cetuximab<br><i>n</i> = 5 | Continuous regorafenib 100 mg plus cetuximab<br><i>n</i> = 6 | Intermittent regorafenib 120 mg plus cetuximab<br><i>n</i> = 8 | Intermittent regorafenib 160 mg plus cetuximab<br><i>n</i> = 23 | Total<br><i>N</i> = 42 |
|------------------------------------------------------|-------------------|-------------------------------------------------------------|--------------------------------------------------------------|----------------------------------------------------------------|-----------------------------------------------------------------|------------------------|
| <b>Blood and lymphatic system disorders, n/N (%)</b> |                   |                                                             |                                                              |                                                                |                                                                 |                        |
| Anemia                                               | Grade 3           | 1/4 (25)                                                    | 0/6                                                          | 0/8                                                            | 0/21                                                            | 1/39 (3)               |
| <b>Investigations, n/N (%)</b>                       |                   |                                                             |                                                              |                                                                |                                                                 |                        |
| aPTT prolonged                                       | Grade 3           | 0/2                                                         | 0/2                                                          | 0/5                                                            | 2/8 (25)                                                        | 2/17 (12)              |
| ALT increased                                        | Grade 3           | 0/4                                                         | 1/6 (17)                                                     | 0/8                                                            | 2/21 (10)                                                       | 3/39 (8)               |
| Alkaline phosphatase increased                       | Grade 3           | 1/4 (25)                                                    | 0/6                                                          | 0/8                                                            | 2/21 (10)                                                       | 3/39 (8)               |
| AST increased                                        | Grade 3           | 0/4                                                         | 1/6 (17)                                                     | 0/8                                                            | 1/21 (5)                                                        | 2/39 (5)               |
|                                                      | Grade 4           | 0/4                                                         | 0/6                                                          | 0/8                                                            | 1/21 (5)                                                        | 1/39 (3)               |
| Blood bilirubin increased                            | Grade 3           | 0/4                                                         | 2/6 (33)                                                     | 0/8                                                            | 1/21 (5)                                                        | 3/39 (8)               |
| Creatinine increased                                 | Grade 3           | 0/4                                                         | 0/6                                                          | 0/8                                                            | 1/21 (5)                                                        | 1/39 (3)               |
| Gamma-glutamyltransferase increased                  | Grade 3           | 2/4 (50)                                                    | 2/6 (33)                                                     | 1/8 (13)                                                       | 6/21 (29)                                                       | 11/39 (28)             |
| INR increased                                        | Grade 3           | 0/0                                                         | 0/1                                                          | 0/2                                                            | 1/5 (20)                                                        | 1/8 (13)               |
| Lipase increased                                     | Grade 3           | 1/4 (25)                                                    | 1/6 (17)                                                     | 0/8                                                            | 2/21 (10)                                                       | 4/39 (10)              |
|                                                      | Grade 4           | 1/4 (25)                                                    | 0/6                                                          | 0/8                                                            | 0/21                                                            | 1/39 (3)               |
| Lymphocyte count decreased                           | Grade 3           | 2/4 (50)                                                    | 4/6 (67)                                                     | 0/8                                                            | 4/21 (19)                                                       | 10/39 (26)             |
|                                                      | Grade 4           | 1/4 (25)                                                    | 0/6                                                          | 0/8                                                            | 1/21 (5)                                                        | 2/39 (5)               |

|                                                   |         |          |          |          |           |            |
|---------------------------------------------------|---------|----------|----------|----------|-----------|------------|
| Platelet count decreased                          | Grade 4 | 0/4      | 1/6 (17) | 0/8      | 0/21      | 1/39 (3)   |
| Serum amylase increased                           | Grade 3 | 1/4 (25) | 0/6      | 0/8      | 0/21      | 1/39 (3)   |
| <b>Metabolism and nutrition disorders n/N (%)</b> |         |          |          |          |           |            |
| Hyperglycemia                                     | Grade 3 | 0/4      | 1/6 (17) | 0/8      | 5/21 (24) | 6/39 (15)  |
| Hyperkalemia                                      | Grade 3 | 0/4      | 0/6      | 0/8      | 1/21 (5)  | 1/39 (3)   |
| Hypoalbuminemia                                   | Grade 3 | 1/4 (25) | 0/6      | 0/8      | 1/21 (5)  | 2/39 (5)   |
| Hypokalemia                                       | Grade 3 | 0/4      | 0/6      | 0/8      | 1/21 (5)  | 1/39 (3)   |
| Hypomagnesemia                                    | Grade 3 | 0/4      | 0/6      | 1/8 (13) | 1/21 (5)  | 2/39 (5)   |
| Hyponatremia                                      | Grade 3 | 1/4 (25) | 1/6 (17) | 0/8      | 2/21 (10) | 4/39 (10)  |
| Hypophosphatemia                                  | Grade 3 | 3/4 (75) | 0/6      | 7/8 (88) | 4/21 (19) | 14/39 (36) |

Abbreviations: aPTT, activated partial thromboplastin time; ALT, alanine aminotransferase; AST, aspartate aminotransferase; INR, international normalized ratio; NCI-CTCAE, National Cancer Institute Common Terminology Criteria for Adverse Events.

**Figure S1. Study design**

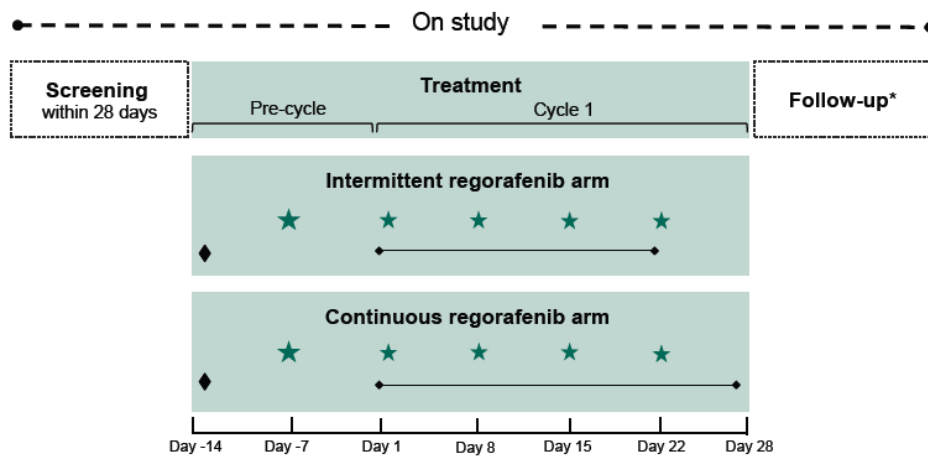

★ Cetuximab IV infusion every 7 days, including a loading dose on Day -7

◆ Oral regorafenib single-dose administration

↔ Oral regorafenib once daily multiple-dose administration

**\*Follow-up:**

- End-of-treatment visit within 7–14 days of last treatment
- Follow-up visit/contact at 30 days after last treatment

Patients could continue therapy until tumor progression, unacceptable toxicity, consent withdrawal, or withdrawal from the study.

IV, intravenous.

**Figure S2. Individual AUC<sub>(0-24)</sub> of regorafenib in the absence (Day -14) and presence of cetuximab (Day 1) at all dose levels**

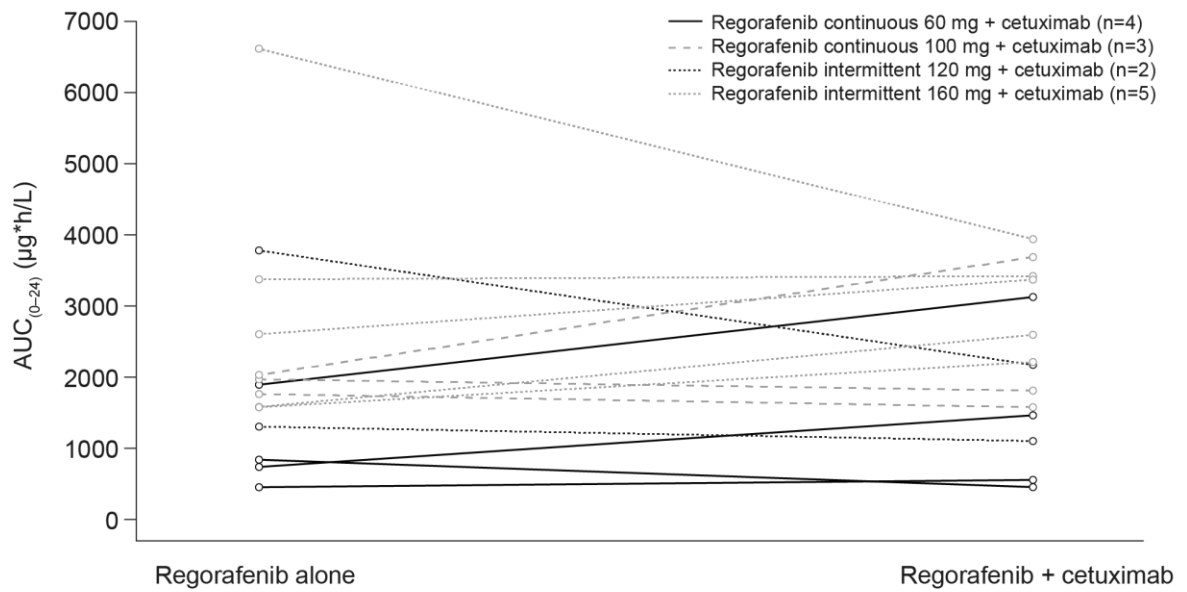

Abbreviations: AUC, area under the concentration–time curve.

**Figure S3. Geometric mean plasma concentration–time profiles with standard deviation of regorafenib 160 mg QD administered alone (Day –14) or with a single dose of cetuximab (Day 1)**

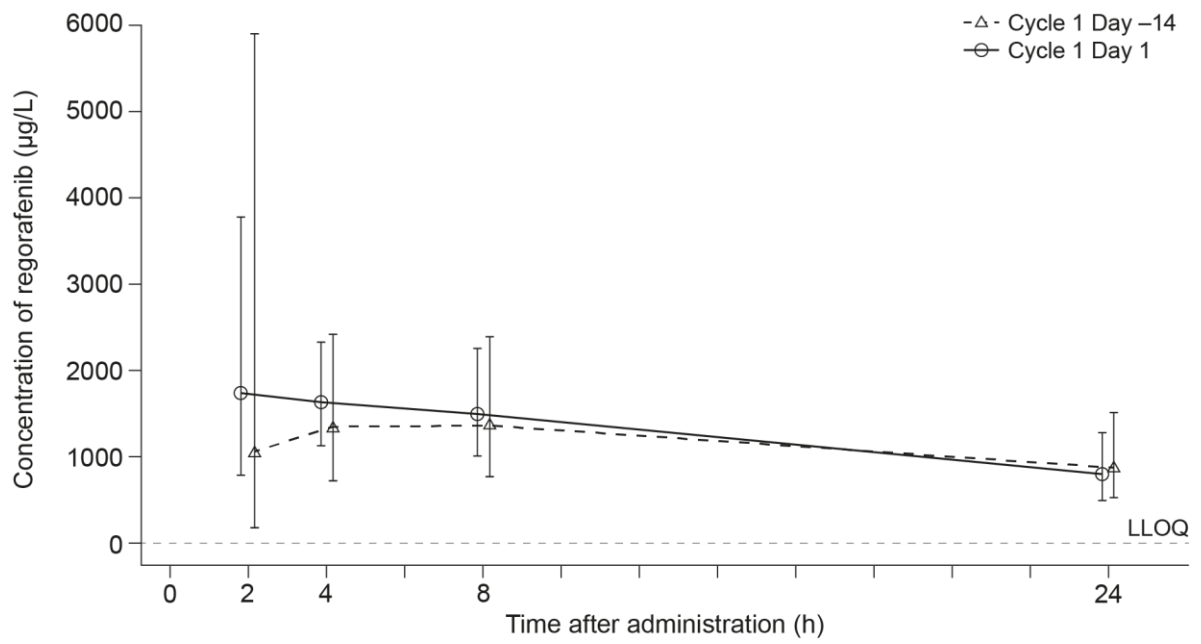

Abbreviations: LLOQ, lower limit of quantification; QD, once daily.
